# Supplementary material for: Low-threshold amplification of spontaneous emission from AgInS2 quantum dots
Source: Royal Society of Chemistry journal article supplement (doi:10.1039/d0tc02192j), 2020-01-01
Supplement: d0tc02192j1.pdf [file d0tc02192j1.pdf]

**Electronic Supplementary Material (ESI) for Journal of Materials Chemistry C. This journal is**

**© The Royal Society of Chemistry 2020**

**Electronic Supplementary Information**

**Title**

**Low-Threshold Amplification of Spontaneous Emission from AgInS<sub>2</sub> Quantum Dots**

**Authors**

Qian Xiong,<sup>ade</sup> Jinlong Yang,<sup>c</sup> Huaiyi Ding,<sup>c</sup> Juan Du,<sup>\*a</sup> Xiaosheng Tang,<sup>\*b</sup> Tongchao Shi,<sup>a</sup> Zhengzheng Liu,<sup>a</sup> Daofu Wu,<sup>b</sup> Hao Lin<sup>b</sup> and Yuxin Leng<sup>\*ade</sup>

**Institutions**

<sup>a</sup> State Key Laboratory of High Field Laser Physics, Shanghai Institute of Optics and Fine Mechanics, Chinese Academy of Sciences, Shanghai 201800, China.

<sup>b</sup> Key Laboratory of Optoelectronic Technology and Systems (Ministry of Education) College of Optoelectronic Engineering, Chongqing University, Chongqing 400044, China.

<sup>c</sup> Department of Physics, University of Science and Technology of China, Hefei 230026, China.

<sup>d</sup> School of Physical Science and Technology, ShanghaiTech University, Shanghai 200031, China.

<sup>e</sup> Center of Materials Science and Optoelectronics Engineering, University of Chinese Academy of Sciences, Beijing 100049, China.

\*Corresponding authors: dujuan@mail.siom.ac.cn, xstang@cqu.edu.cn, lengyuxin@mail.siom.ac.cn

**Table S1.** Time-resolved PL decays for AIS QDs below threshold and above threshold.

|                 | $T_1$ (ps) | $T_2$ (ps) |
|-----------------|------------|------------|
| Below threshold | 900        | 29000      |
| Above threshold | 500        | 8000       |

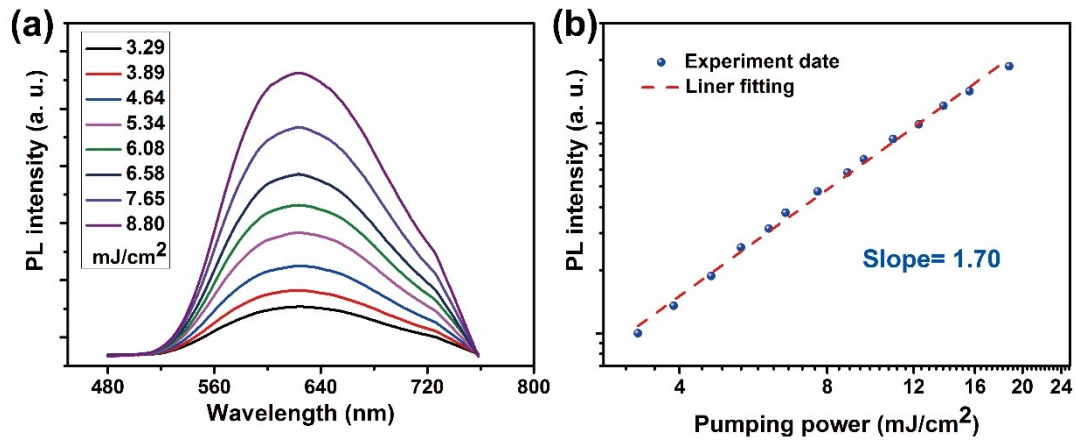

**Figure S1.** (a) Increasing power-dependent two photo induced PL intensity of AIS QDs. (b) A log–log plot of quadratic dependence of two photo PL intensity vs pumping power.

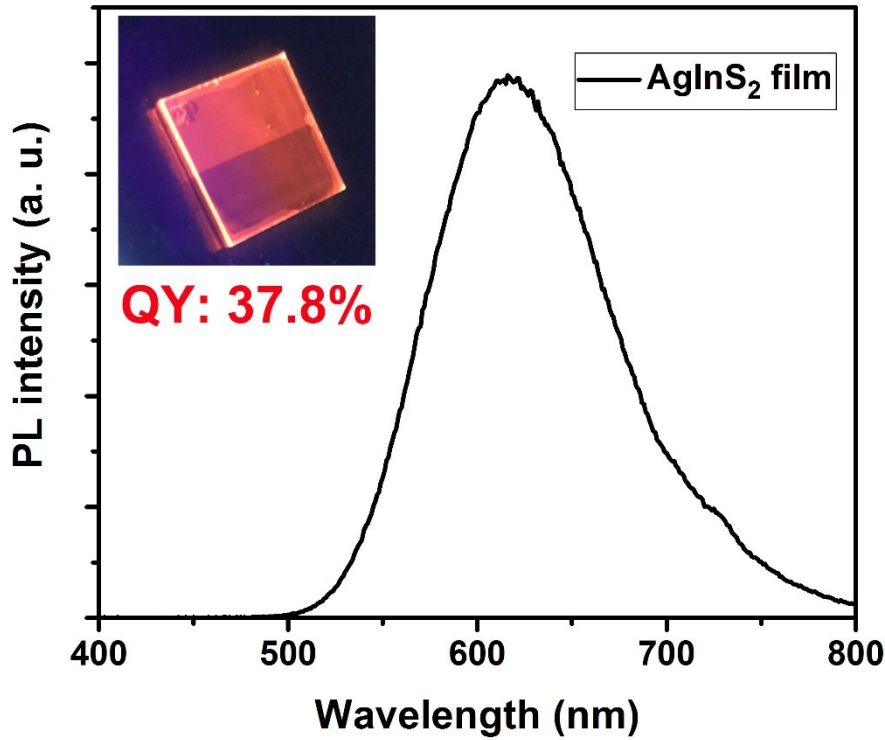

**Figure S2.** The PL spectroscopy of AIS film.

The whole process of fabricating the devices is listed in detail as follow.

At first, we sputtered SiO<sub>2</sub> and TiO<sub>2</sub> on a transparent quartz plate by magnetron sputtering. The thickness of SiO<sub>2</sub> is 106 nm, and the thickness of TiO<sub>2</sub> is 66 nm. Three pairs are sputtered to form the upper DBR shown in the **Figure S3a**. Secondly, we alternately sputtered SiO<sub>2</sub> and TiO<sub>2</sub> on the Si wafer by magnetron sputtering. The thickness of SiO<sub>2</sub> is 106 nm, and the thickness of TiO<sub>2</sub> is 66 nm. Seven pairs are sputtered to form the lower DBR shown in the **Figure S3b**. Thirdly, we spin-coated quantum dots on the upper DBR, where the speed is 4000 rpm for 60 s shown in the **Figure S3c**. Finally, the upper layer of DBR is reversely buckled on the lower layer of DBR, and the optical epoxy glue was dripped around, then the upper part is covered with a heavy object and it was left to stand at room temperature for 24 hours. After the glue is solidified, we wipe away the excess glue. It is displayed in the **Figure S3d**.

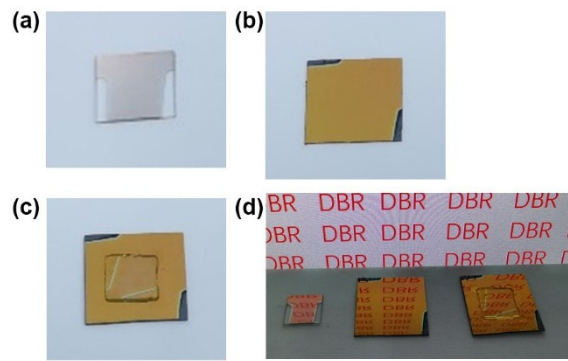

**Figure S3.** The whole process of fabricating the device.

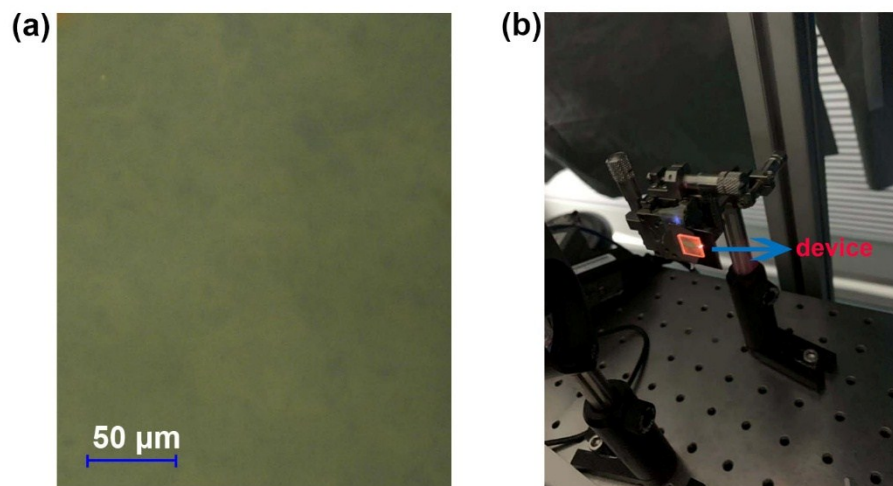

**Figure S4.** (a) The micrograph of the AIS QD film. (b) Photographic image of the output spot from the AgInS<sub>2</sub> device.

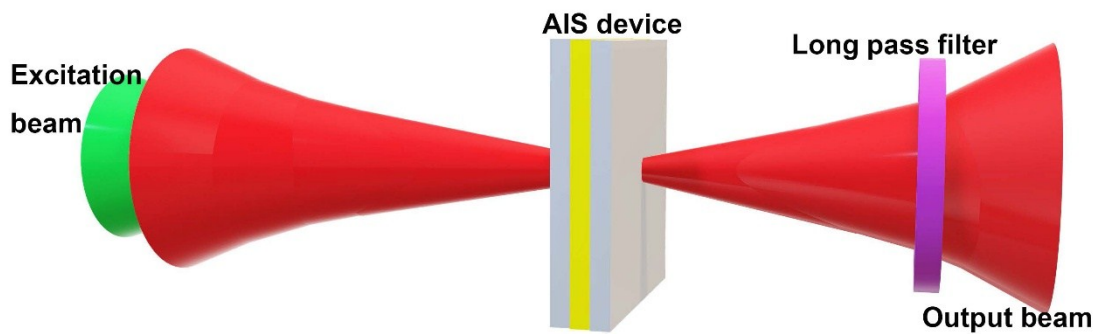

**Figure S5.** Schematic of a vertically pumped AIS device with a long pass filter to remove any residual pump excitation beam as much as possible.

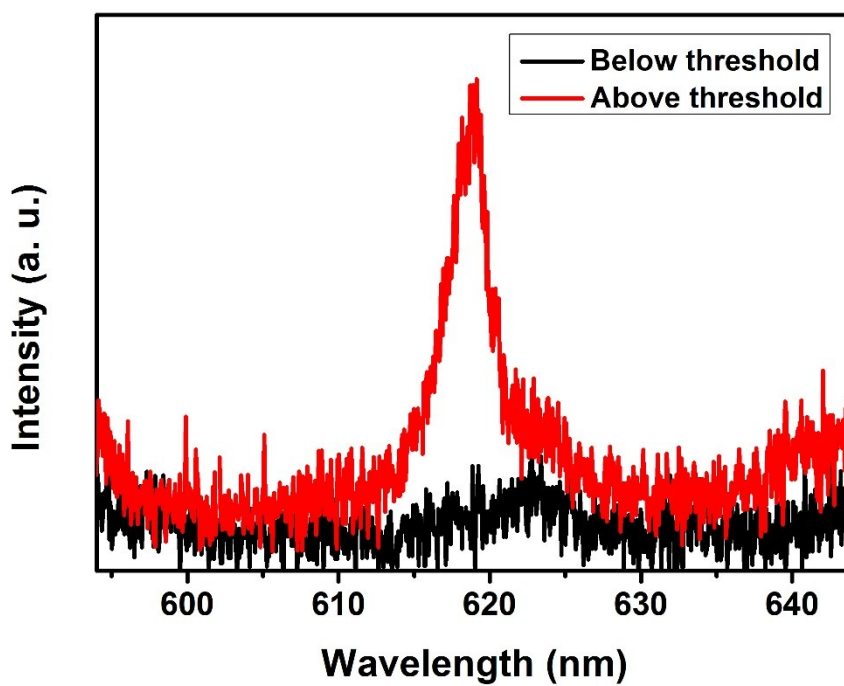

**Figure S6.** Emission spectra from the AIS devices below and above the threshold.

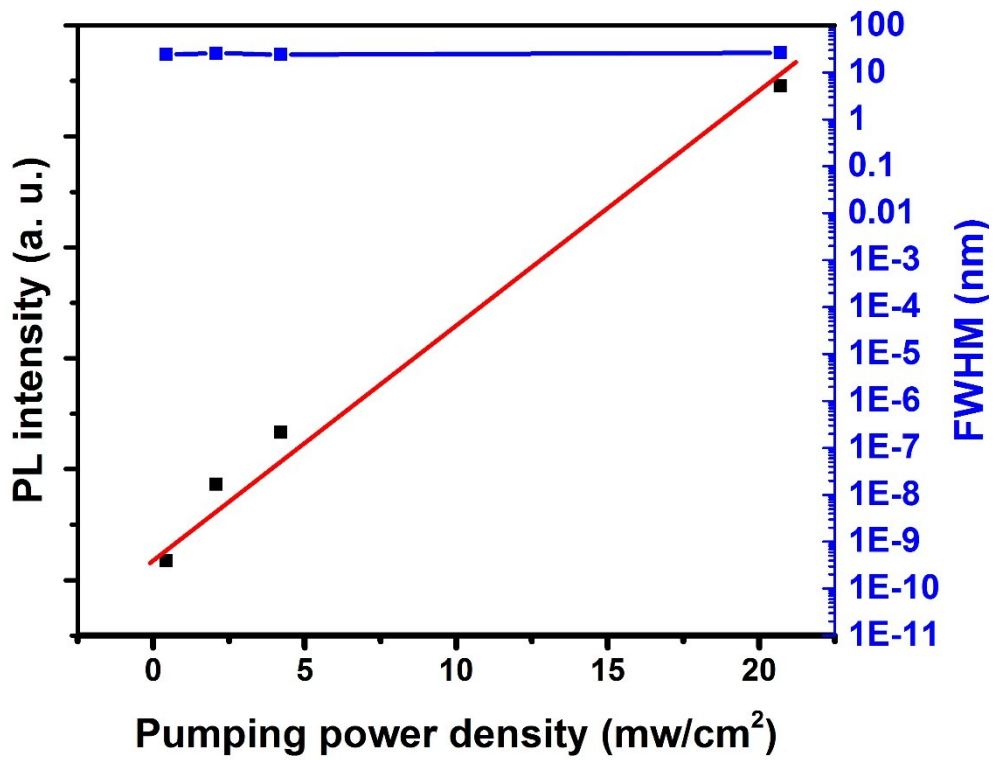

Figure S7. L-L curve and the change of FWHM for one layer DBR.

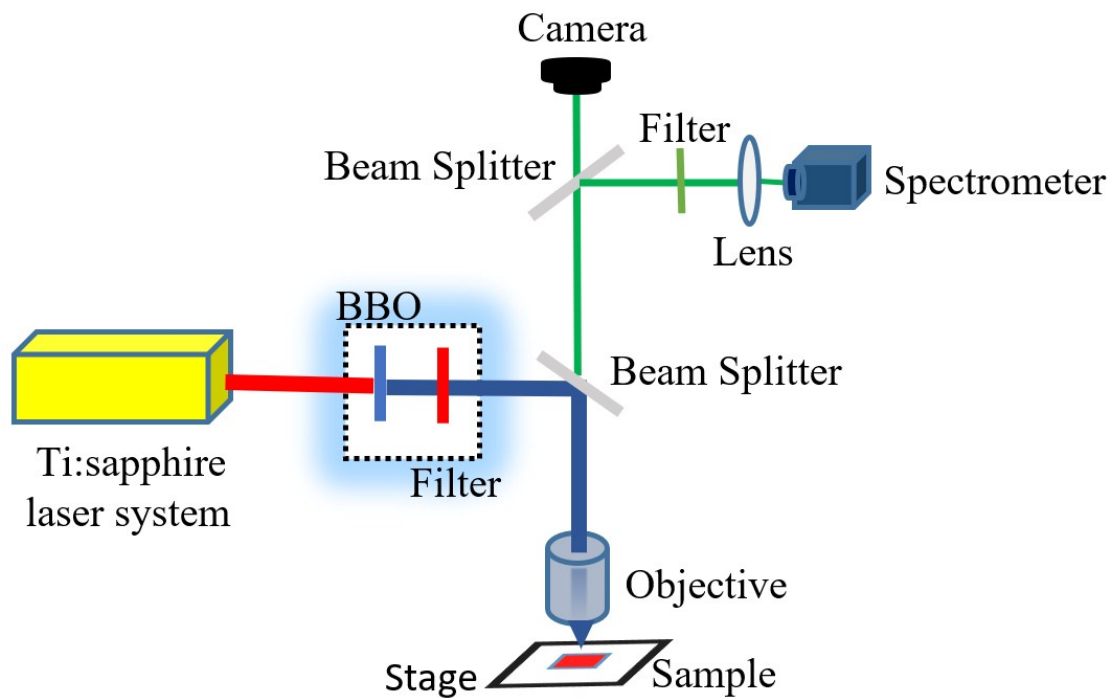

Figure S8. A figure with the experimental set-up.
